# Supplementary material for: Estimated Prevalence of Smoking and Smoking-Attributable Mortality Associated With Graphic Health Warnings on Cigarette Packages in the US From 2022 to 2100
Source: PubMed Central journal article supplement (PMC8796938; doi:10.1001/jamahealthforum.2021.2852), 2021-09-24
Supplement: jamahealthforum-e212852-s001.pdf [file jamahealthforum-e212852-s001.pdf]

## Supplementary Online Content

Tam J, Jeon J, Thrasher JF, et al. Estimated prevalence of smoking and smoking-attributable mortality associated with graphic health warnings on cigarette packages in the US from 2022 to 2100. *JAMA Health Forum*. 2021;2(9):e212852.

doi:10.1001/jamahealthforum.2021.2852

### **eAppendix.**

**eFigure 1.** CISNET Smoking History Generator Population Model diagram

**eTable 1.** Former smoker relative risk of mortality by years since quit vs current smoker

**eFigure 2.** Former smoker exponential model interpolation of relative risk of mortality by years since quit vs current smoker, men

**eFigure 3.** Former smoker exponential model interpolation of relative risk of mortality by years since quit vs current smoker, women

**eTable 2.** Predicted cumulative smoking attributable deaths averted (in thousands) and life-years gained (in millions) from 2012-2032

**eTable 3.** Predicted cumulative smoking attributable deaths averted (in thousands) and life-years gained (in millions) from 2012-2042

**eTable 4.** Predicted cumulative smoking attributable deaths averted (in thousands) and life-years gained (in millions) from 2012-2052

This supplementary material has been provided by the authors to give readers additional information about their work.

eFigure 1. CISNET Smoking History Generator Population Model Diagram

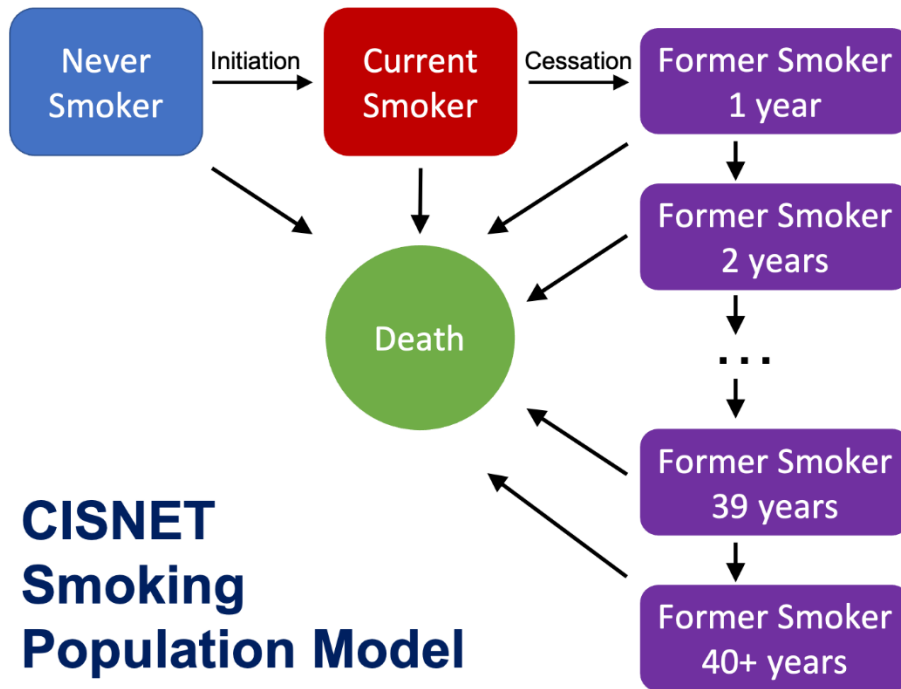

### Model equations

For each gender and birth cohort  $c = 1864$  to  $2100$ , the model tracks the number of individuals in each of the smoking status compartments  $Never[a,c]$ ,  $Current[a,c]$ ,  $Former[a,c,j]$ , where  $a = 0$  to  $99$  denotes age and  $j = 1$  to  $40$ . Here  $a$  and  $j$  denote age and years since quit for former smokers, respectively. Individuals born in year  $c$  are all assigned to the never smoker compartment at age  $a=0$ , where  $Births[c]$  denote the number of births in year  $c$ . Let  $Never[a,c]$  and  $Current[a,c]$  be the number of never smokers and current smokers at age  $a$  who were born in year  $c$ . Similarly, let  $Former[a,c,j]$  be the number of former smokers at age  $a$  who were born in year  $c$  and quit smoking for  $j$  years. Individuals then move between compartments annually according to the smoking initiation ( $init[a,c]$ ), cessation ( $cess[a,c]$ ) and death probabilities by smoking status ( $deathnever[a,c]$ ,  $deathcurrent[a,c]$ ,  $deathformer[a,c,j]$ ) and the following equations:

```
##### Loop over birth-cohorts
For (c=1864 to 2100)

Never[0,c] = Births[c]
Current[0,c] = 0
Former[0,c,j] = 0, j = 1, ..., 40
```

#### Loop over ages  
 For (a=0 to 99)

$$Never[a, c] = Never[a - 1, c] * (1 - init[a - 1, c]) * (1 - deathnever[a - 1, c])$$

$$Current[a, c] = Never[a - 1, c] * init[a - 1, c] * (1 - deathnever[a - 1, c]) + Current[a - 1] * (1 - cess[a - 1, c]) * (1 - deathcurrent[a - 1, c])$$

$$Former[a, c, 1] = Current[a - 1, c] * cess[a - 1, c] * (1 - deathcurrent[a - 1, c])$$

## Loop over years since quit  
 For (j=2:39)

$$Former[a, c, j] = Former[a - 1, c, j - 1] * (1 - deathformer[a - 1, c, j - 1])$$

$$Former[a, c, 40] = Former[a - 1, c, 39] * (1 - deathformer[a - 1, c, 39]) + Former[a - 1, c, 40] * (1 - deathformer[a - 1, c, 40])$$

**eTable 1. Former smoker relative risk of mortality by years since quit vs. current smoker**

| Years since quitting | Mid-point | Men - RR former vs current smoker | Women - RR former vs current smoker |
|----------------------|-----------|-----------------------------------|-------------------------------------|
| <2                   | 1         | 1.07*                             | 0.87                                |
| 2-4                  | 3         | 1.02*                             | 0.75                                |
| 5-9                  | 7         | 0.83                              | 0.84                                |
| 10-19                | 14.5      | 0.77                              | 0.55                                |
| 20-29                | 24.5      | 0.54                              | 0.49                                |
| 30-39                | 34.5      | 0.47                              | 0.41                                |

\* Not statistically significantly different from 1, so set to 1 for development of RR model.  
 RR = relative risk estimates. See Thun MJ, Carter BD, Feskanich D, et al. 50-year trends in smoking-related mortality in the United States. *N Engl J Med.* 2013;368(4):351-364.

**eFigure 2. Former smoker exponential model interpolation of relative risk of mortality by years since quit vs. current smoker, Men**

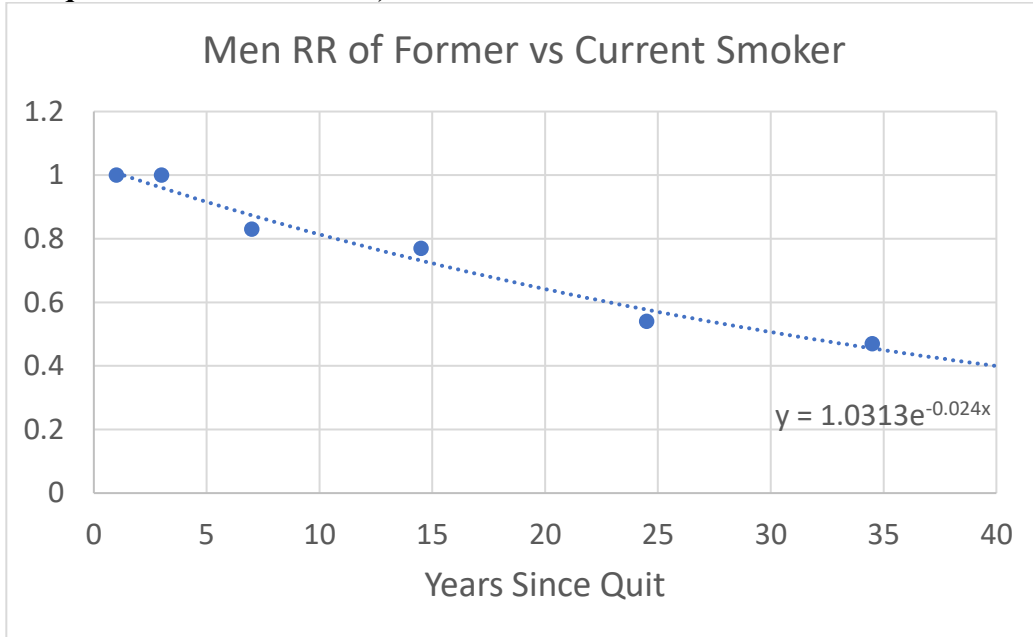

**eFigure 3. Former smoker exponential model interpolation of relative risk of mortality by years since quit vs. current smoker, Women**

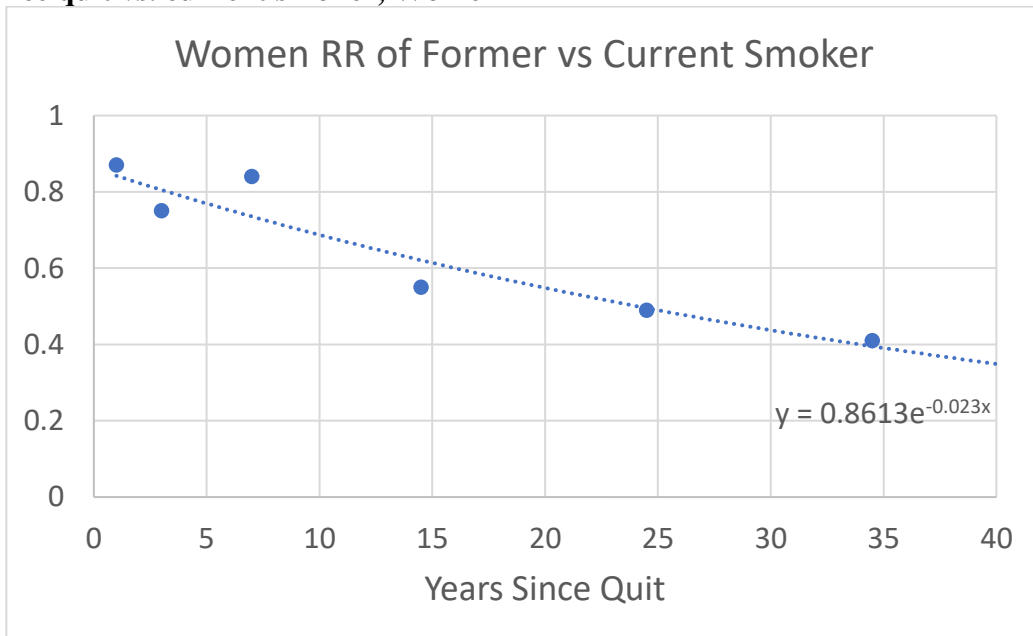

**eTable 2. Predicted Cumulative Smoking Attributable Deaths Averted (in thousands) and Life-Years Gained (in millions) from 2012-2032**

|                                             | Policy implemented in 2022                      |                          |                          | Policy implemented in 2012                      |                           |                           |
|---------------------------------------------|-------------------------------------------------|--------------------------|--------------------------|-------------------------------------------------|---------------------------|---------------------------|
|                                             | Smoking initiation reduced by                   |                          |                          | Smoking initiation reduced by                   |                           |                           |
| Smoking cessation increased by <sup>a</sup> | 5%                                              | 10%                      | 15%                      | 5%                                              | 10%                       | 15%                       |
|                                             | Smoking-attributable deaths averted (thousands) |                          |                          | Smoking-attributable deaths averted (thousands) |                           |                           |
| 25%                                         | <b>15.7</b> <sup>b</sup>                        | 15.9                     | 16.0                     | <b>67.0</b> <sup>b</sup>                        | 68.0                      | 68.9                      |
| 50%                                         | 30.7                                            | <b>30.9</b> <sup>c</sup> | 31.0                     | 130.5                                           | <b>131.5</b> <sup>c</sup> | 132.4                     |
| 75%                                         | 45.2                                            | 45.3                     | <b>45.4</b> <sup>d</sup> | 191.5                                           | 192.5                     | <b>193.4</b> <sup>d</sup> |
|                                             | Life-years gained (millions)                    |                          |                          | Life-years gained (millions)                    |                           |                           |
| 25%                                         | <b>0.05</b> <sup>b</sup>                        | 0.05                     | 0.05                     | <b>0.35</b> <sup>b</sup>                        | 0.36                      | 0.36                      |
| 50%                                         | 0.09                                            | <b>0.09</b> <sup>c</sup> | 0.09                     | 0.69                                            | <b>0.69</b> <sup>c</sup>  | 0.70                      |
| 75%                                         | 0.13                                            | 0.13                     | <b>0.13</b> <sup>d</sup> | 1.01                                            | 1.01                      | <b>1.02</b> <sup>d</sup>  |

<sup>a</sup> Cessation effect is applied in 2012 or 2022 (y0) with a decay rate of 20% in subsequent years (e.g.  $50\% \times (1 - 0.2)^{year-(y0-1)}$ ).

<sup>b</sup> "Most conservative" scenario.

<sup>c</sup> "Main estimate" scenario.

<sup>d</sup> "Most optimistic" scenario.

**eTable 3. Predicted Cumulative Smoking Attributable Deaths Averted (in thousands) and Life-Years Gained (in millions) from 2012-2042**

|                                             | Policy implemented in 2022                      |                           |                           | Policy implemented in 2012                      |                           |                           |
|---------------------------------------------|-------------------------------------------------|---------------------------|---------------------------|-------------------------------------------------|---------------------------|---------------------------|
|                                             | Smoking initiation reduced by                   |                           |                           | Smoking initiation reduced by                   |                           |                           |
| Smoking cessation increased by <sup>a</sup> | 5%                                              | 10%                       | 15%                       | 5%                                              | 10%                       | 15%                       |
|                                             | Smoking-attributable deaths averted (thousands) |                           |                           | Smoking-attributable deaths averted (thousands) |                           |                           |
| 25%                                         | <b>59.2</b> <sup>b</sup>                        | 59.9                      | 60.7                      | <b>141.7</b> <sup>b</sup>                       | 145.3                     | 148.8                     |
| 50%                                         | 115.0                                           | <b>115.8</b> <sup>c</sup> | 116.5                     | 274.4                                           | <b>277.9</b> <sup>c</sup> | 281.4                     |
| 75%                                         | 168.5                                           | 169.2                     | <b>170.0</b> <sup>d</sup> | 401.9                                           | 405.3                     | <b>408.8</b> <sup>d</sup> |
|                                             |                                                 |                           |                           |                                                 |                           |                           |
|                                             | Life-years gained (millions)                    |                           |                           | Life-years gained (millions)                    |                           |                           |
| 25%                                         | <b>0.32</b> <sup>b</sup>                        | 0.32                      | 0.32                      | <b>1.04</b> <sup>b</sup>                        | 1.06                      | 1.08                      |
| 50%                                         | 0.62                                            | <b>0.62</b> <sup>c</sup>  | 0.63                      | 2.01                                            | <b>2.04</b> <sup>c</sup>  | 2.06                      |
| 75%                                         | 0.91                                            | 0.91                      | <b>0.91</b> <sup>d</sup>  | 2.95                                            | 2.97                      | <b>3.00</b> <sup>d</sup>  |

<sup>a</sup> Cessation effect is applied in 2012 or 2022 (y0) with a decay rate of 20% in subsequent years (e.g.  $50\% \times (1 - 0.2)^{year-(y0-1)}$ ).

<sup>b</sup> "Most conservative" scenario.

<sup>c</sup> "Main estimate" scenario.

<sup>d</sup> "Most optimistic" scenario.

**eTable 4. Predicted Cumulative Smoking Attributable Deaths Averted (in thousands) and Life-Years Gained (in millions) from 2012-2052**

|                                             | Policy implemented in 2022                      |                           |                           | Policy implemented in 2012                      |                           |                           |
|---------------------------------------------|-------------------------------------------------|---------------------------|---------------------------|-------------------------------------------------|---------------------------|---------------------------|
|                                             | Smoking initiation reduced by                   |                           |                           | Smoking initiation reduced by                   |                           |                           |
| Smoking cessation increased by <sup>a</sup> | 5%                                              | 10%                       | 15%                       | 5%                                              | 10%                       | 15%                       |
|                                             | Smoking-attributable deaths averted (thousands) |                           |                           | Smoking-attributable deaths averted (thousands) |                           |                           |
| 25%                                         | <b>116.6</b> <sup>b</sup>                       | 119.2                     | 121.9                     | <b>213.7</b> <sup>b</sup>                       | 223.4                     | 233.2                     |
| 50%                                         | 225.4                                           | <b>228.1</b> <sup>c</sup> | 230.7                     | 409.4                                           | <b>419.0</b> <sup>c</sup> | 428.6                     |
| 75%                                         | 329.5                                           | 332.1                     | <b>334.7</b> <sup>d</sup> | 597.1                                           | 606.6                     | <b>616.1</b> <sup>d</sup> |
|                                             |                                                 |                           |                           |                                                 |                           |                           |
|                                             | Life-years gained (millions)                    |                           |                           | Life-years gained (millions)                    |                           |                           |
| 25%                                         | <b>0.86</b> <sup>b</sup>                        | 0.87                      | 0.89                      | <b>2.01</b> <sup>b</sup>                        | 2.09                      | 2.17                      |
| 50%                                         | 1.66                                            | <b>1.68</b> <sup>c</sup>  | 1.70                      | 3.86                                            | <b>3.94</b> <sup>c</sup>  | 4.02                      |
| 75%                                         | 2.43                                            | 2.45                      | <b>2.47</b> <sup>d</sup>  | 5.65                                            | 5.72                      | <b>5.80</b> <sup>d</sup>  |

<sup>a</sup> Cessation effect is applied in 2012 or 2022 (y0) with a decay rate of 20% in subsequent years (e.g.  $50\% \times (1 - 0.2)^{year-(y0-1)}$ ).

<sup>b</sup> "Most conservative" scenario.

<sup>c</sup> "Main estimate" scenario.

<sup>d</sup> "Most optimistic" scenario.
